# Supplementary material for: The influence of protein folding on the copper affinities of trafficking and target sites
Source: Royal Society of Chemistry journal article supplement (doi:10.1039/c2dt32166a), 2012-11-21
Supplement: c2dt32166a.pdf [file c2dt32166a.pdf]

## **Supporting Information**

# **The influence of protein folding on the copper affinities of trafficking and target sites**

*Stephen Allen, Adriana Badarau and Christopher Dennison*

Institute for Cell and Molecular Biosciences, Medical School, Newcastle University,  
Newcastle upon Tyne NE2 4HH, United Kingdom

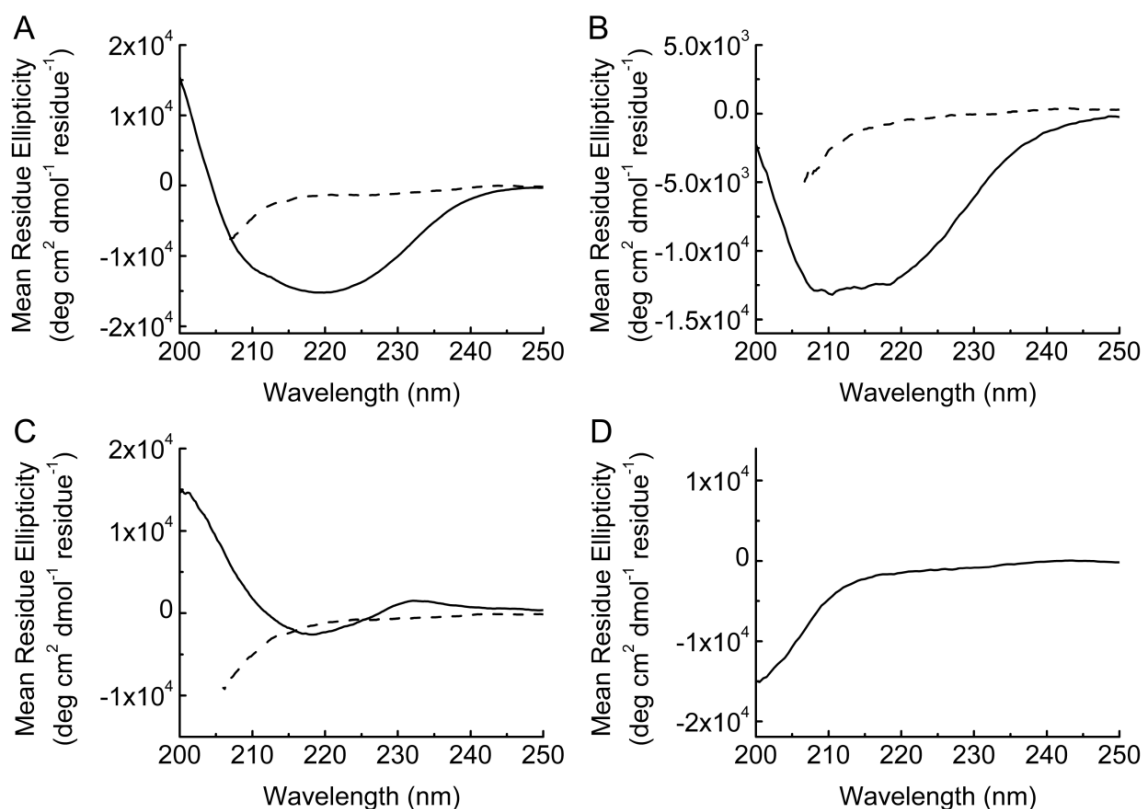

**Fig. S1** Far-UV circular dichroism (CD) spectra of apo-HAH1 (A), *S. cerevisiae* apo-Atx1 (B), apo-plastocyanin from *Synechocystis* PCC 6803 (C) and human  $\beta$ -secretase C-terminal domain peptide (BACE1-CTD) (D) in the absence (solid line) and presence (dashed line) of 7 M urea. Protein concentrations were 0.5 mg/ml, except for BACE1-CTD (0.4 mg/ml), and the spectra measured in 20 mM 4-(2-hydroxyethyl)piperazine-1-ethanesulfonic acid (Hepes) containing 200 mM NaCl (200 mM KCl for BACE1-CTD) at pH 7.0.

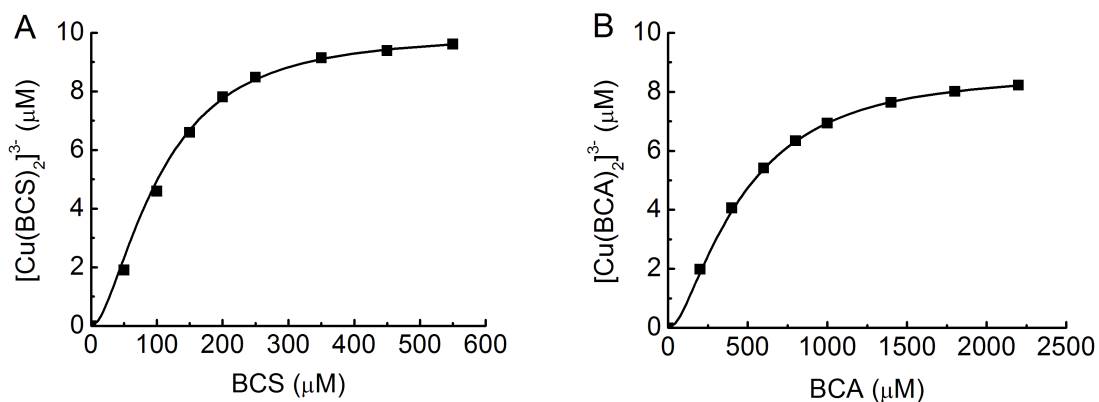

**Fig. S2** Titrations of (A) bathocuproine disulfonate (BCS) into Cu(I)-BACE1-CTD (10  $\mu\text{M}$ ) plus an excess of apo-peptide (10  $\mu\text{M}$  apo-BACE1-CTD) in 20 mM Hepes containing 200 mM KCl at pH 7.0, and of (B) bicinchoninic acid (BCA) into Cu(I)-thioredoxin (9  $\mu\text{M}$ ) plus an excess of apo-protein (5  $\mu\text{M}$ ) in 20 mM Hepes containing 200 mM NaCl at pH 7.0. The lines show fits of the data to equation S1 giving  $K_b$  values of  $(3.1 \pm 0.2) \times 10^{16}$  (A) and  $(3.1 \pm 0.1) \times 10^{15} \text{M}^{-1}$  (B).

**Table S1** Matrix assisted laser desorption ionization time-of-flight (MALDI-TOF) and Fourier transform ion cyclotron resonance (FT-ICR) mass spectrometry (MS) results for *Synechocystis* His61Lys Atx1 and *S. cerevisiae* Atx1

| Protein                               | MS Analysis | Experimental mass (Da) | Theoretical mass (Da) |
|---------------------------------------|-------------|------------------------|-----------------------|
| <i>Synechocystis</i><br>His61Lys Atx1 | FT-ICR      | 6542                   | 6545 (-Met)           |
| <i>S. cerevisiae</i><br>Atx1          | MALDI-TOF   | 8089                   | 8091 (-Met)           |

**Table S2** Elution volumes and corresponding calculated apparent molecular weights for wild type (WT) *Synechocystis* apo-Atx1, His61Lys *Synechocystis* apo- and Cu(I)-Atx1 and *S. cerevisiae* apo-Atx1 determined from analytical gel filtration chromatography

| Protein                                       | Elution Volume (ml) | Apparent Mass (kDa) |
|-----------------------------------------------|---------------------|---------------------|
| <i>Synechocystis</i> WT apo-Atx1 <sup>a</sup> | 13.90               | 13.2                |
| <i>Synechocystis</i> His61Lys apo-Atx1        | 12.86               | 21.2                |
| <i>Synechocystis</i> His61Lys Cu(I)-Atx1      | 13.92               | 13.8                |
| <i>S. cerevisiae</i> apo-Atx1                 | 14.55               | 10.6                |

<sup>a</sup> Data from reference 1.

**Table S3** Comparison of secondary structure content compositions determined from available structures using STRIDE<sup>a</sup> with those calculated from far-UV CD spectra of mainly apo-proteins using Dichroweb<sup>b</sup>

| Protein <sup>c</sup>                      | Data                   | Secondary structure element (%) |                |      |        |
|-------------------------------------------|------------------------|---------------------------------|----------------|------|--------|
|                                           |                        | $\alpha$ -helix                 | $\beta$ -sheet | Turn | Random |
| <i>Synechocystis</i> WT Atx1 <sup>d</sup> | Crystal structure      | 40                              | 21             | 21   | 19     |
|                                           | Far-UV CD <sup>e</sup> | 48                              | 11             | 17   | 25     |
| <i>Synechocystis</i> His61Lys apo-Atx1    | Far-UV CD              | 21                              | 24             | 19   | 36     |
| <i>Synechocystis</i> His61Lys Cu(I)-Atx1  | Far-UV CD              | 42                              | 6              | 30   | 22     |
| <i>S. cerevisiae</i> Atx1                 | Crystal structure      | 32                              | 36             | 11   | 21     |
|                                           | Far-UV CD <sup>e</sup> | 21                              | 33             | 22   | 24     |
| HAH1                                      | Crystal structure      | 36                              | 36             | 6    | 22     |
|                                           | Far-UV CD <sup>e</sup> | 42                              | 15             | 17   | 26     |
| <i>Synechocystis</i> plastocyanin         | Crystal structure      | 7                               | 53             | 17   | 23     |
|                                           | Far-UV CD <sup>e</sup> | 7                               | 44             | 19   | 30     |

<sup>a</sup>Reference 2. <sup>b</sup>Reference 3. <sup>c</sup>The following PDB files were used for the determination of protein secondary structure compositions using STRIDE: 2XMT (WT *Synechocystis* Atx1), 1FEE (HAH1), 1CC8 (*S. cerevisiae* Atx1) and 1PCS (*Synechocystis* plastocyanin). <sup>d</sup>Data from reference 1. <sup>e</sup> For reduced apo-proteins.

### Determination of Cu(I) affinities

Cu(I) affinities ( $K_b$  values) were obtained by fitting data from titrations of BCS or BCA into a mixture of Cu(I)-protein and excess apo-protein to equation S1, where [L], [P] and [Cu] represent the total concentrations of BCS or BCA, protein and Cu(I) respectively, and  $\beta$  is the overall association constant of  $[\text{Cu}(\text{BCS})_2]^{3-}$  or  $[\text{Cu}(\text{BCA})_2]^{3-}$ .<sup>4,5</sup>

$$[\text{L}] = 2[\text{CuL}_2] + \sqrt{\frac{K_b([\text{P}] - [\text{Cu}] + [\text{CuL}_2])[\text{CuL}_2]}{([\text{Cu}] - [\text{CuL}_2])\beta}} \quad (\text{S1})$$

### Supporting References

- 1 A. Badarau, S. J. Firbank, A. A. McCarthy, M. J. Banfield and C. Dennison, *Biochemistry*, 2010, **49**, 7798.
- 2 M. Heinig and D. Frishman, *Nucleic Acids Res.*, 2004, **32**, W500.
- 3 L. Whitmore and B. A. Wallace, *Nucleic Acids Res.*, 2004, **32**, W668.
- 4 A. Badarau and C. Dennison, *J. Am. Chem. Soc.*, 2011, **133**, 2983.
- 5 A. Badarau and C. Dennison, *Proc. Natl. Acad. Sci. U.S.A.*, 2011, **108**, 13007.
